# Supplementary material
Source: PubMed Central journal article supplement (PMC2832910)
Supplement: NIHMS180490-supplement-Supplementary_Data.pdf [file NIHMS180490-supplement-Supplementary_Data.pdf]

## Supplemental Data: Feedback Regulation of Opposing Enzymes Generates Robust, All-or-None Bistable Responses

James E. Ferrell, Jr.

Here we show how we arrived at the curves shown in the rate balance plots.

**Inactivation rate, one-loop system.** For the one-loop system where the activator is feedback-activated but the inactivator is not, the rate of inactivation of  $A$  is given by:

$$Rate_{inact} = k_1 x \quad [\text{Eq 1}]$$

where  $x$  represents the fraction of  $A$  that is active (and hence can be inactivated). Varying the rate constant  $k_1$  simply changes the slope of the red line (Fig. 2AB).

**Activation rate, one-loop or two-loop system.** The rate of activation of  $A$  is more complicated. It depends upon the activity of the activator enzyme, which in turn depends upon the activity of  $A$ . Here we will assume that the response of the activator to  $A$  is rapid, allowing us to write the rate equation in terms of a single variable,  $x$ , which represents the fraction of  $A$  that is active.

We assume that the direct regulation of the activator by  $x$  is described by a Hill equation. The rate of activation of  $A$  will be proportional to a rate constant, the fraction of  $A$  that is unactivated ( $1-x$ ), and the basal and activated activities of the activator. This yields Eq 2:

$$Rate_{act} = k_2 \left( \beta_2 \frac{K_2^{n_2}}{K_2^{n_2} + x^{n_2}} + \frac{x^{n_2}}{K_2^{n_2} + x^{n_2}} \right) (1-x) \quad [\text{Eq 2}]$$

where  $k_2$  is the rate constant for activation of  $A$  by the fully-active activator,  $\beta_2$  is the basal activity the activator as a fraction of the maximal activity,  $K_2$  is the fractional activity of  $A$  at which the activator is half-maximally active, and  $n_2$  is the Hill coefficient for the activation of the activator by active  $A$ . Note that the Hill functions allow the activation curve to wrap around the straight-line inactivation curve; ultrasensitivity is required for bistability in this case. However, if we had used a hyperbolic (Michaelian) inactivation rate function, we could have generated bistability without making the feedback ultrasensitive. See [S1] for further discussion of this point.

Note that varying the rate constant  $k_2$  would simply stretch the blue curve up or down (Fig. 2BC).

**Inactivation rate, two-loop system.** In the two-loop system, the activation rate is still given by Eq 2, but the inactivation rate is different. If the inactivation of the inactivator enzyme by active  $A$  is well-approximated by a Hill function, then the inactivation rate is given by:

$$Rate_{inact} = k_1 \left( \beta_1 \frac{x^{n_1}}{K_1^{n_1} + x^{n_1}} + \frac{K_1^{n_1}}{K_1^{n_1} + x^{n_1}} \right) x \quad [\text{Eq 3}]$$

where  $k_1$  is the rate constant for inactivation of  $A$  by the maximally-active inactivator enzyme,  $\beta_1$  is the basal activity of the inactivator as a fraction of the maximal activity,  $K_1$  is the fractional activity of  $A$  at which the inactivator is half-maximally inactivated, and  $n_1$  is the Hill coefficient for the inactivation of the inactivator by  $A$ .

Varying the rate constant  $k_1$  stretches the red curve up or down (Fig. 2C).

**Parameters.** For the calculations shown in Fig. 2 we took  $k_1$  to be a range of values,  $k_2=1$ ,  $n_1=3$ ,  $n_2=3$ ,  $K_1=0.3$ ,  $K_2=0.3$ ,  $\beta_1=0$ , and  $\beta_2=0.05$ . These parameter values made the red and blue curves be approximately mirror images of each other (Fig. 2C). However, even for less symmetrical parameter choices, the robustness of the two-loop system can be very high.

Note that with the two-loop system it is possible to choose parameters that make the curves intersect at five points—the system becomes tristable—but the tristability is relatively brittle.

**Alternative strategies for improving robustness.** One can also improve the robustness of the one-loop system (Fig. 2B) by assuming that the inactivation rate curve is hyperbolic rather than a straight line, as would be the case if the inactivator enzyme is running close to saturation.

### Supplemental Reference

- S1. Ferrell, J.E., Jr., and Xiong, W. (2001). Bistability in cell signaling: how to make continuous processes discontinuous, and reversible processes irreversible. *Chaos* 11, 227-236.
